# Supplementary material
Source: PubMed Central journal article supplement (PMC4665772)
Supplement: JCI80714.sd.pdf [file JCI80714.sd.pdf]

# Supplemental Table S2

| Ingenuity Canonical Pathways                                    | -log(p-value) |
|-----------------------------------------------------------------|---------------|
| EIF2 Signaling                                                  | 28.70         |
| Protein Ubiquitination Pathway                                  | 25.80         |
| Regulation of eIF4 and p70S6K Signaling                         | 17.20         |
| tRNA Charging                                                   | 13.20         |
| mTOR Signaling                                                  | 11.80         |
| p70S6K Signaling                                                | 11.20         |
| Actin Cytoskeleton Signaling                                    | 10.30         |
| Purine Nucleotides De Novo Biosynthesis II                      | 7.35          |
| PI3K/AKT Signaling                                              | 7.27          |
| Systemic Lupus Erythematosus Signaling                          | 6.58          |
| RAN Signaling                                                   | 6.15          |
| 14-3-3-mediated Signaling                                       | 6.01          |
| Cell Cycle: G2/M DNA Damage Checkpoint Regulation               | 6.00          |
| Breast Cancer Regulation by Stathmin1                           | 5.84          |
| VEGF Signaling                                                  | 5.82          |
| Role of NFAT in Regulation of the Immune Response               | 5.77          |
| Signaling by Rho Family GTPases                                 | 5.71          |
| ILK Signaling                                                   | 5.60          |
| Fcy Receptor-mediated Phagocytosis in Macrophages and Monocytes | 5.40          |
| Glycolysis I                                                    | 5.20          |
| Clathrin-mediated Endocytosis Signaling                         | 5.10          |
| Tight Junction Signaling                                        | 5.00          |
| Germ Cell-Sertoli Cell Junction Signaling                       | 4.90          |
| Gap Junction Signaling                                          | 4.90          |
| Ephrin B Signaling                                              | 4.80          |
| Huntington's Disease Signaling                                  | 4.79          |
| B Cell Development                                              | 4.67          |
| Integrin Signaling                                              | 4.66          |
| CD28 Signaling in T Helper Cells                                | 4.65          |
| B Cell Receptor Signaling                                       | 4.49          |
| DNA Double-Strand Break Repair by Non-Homologous End Joining    | 4.44          |
| RhoA Signaling                                                  | 4.35          |
| Methionine Degradation I (to Homocysteine)                      | 4.24          |
| CTLA4 Signaling in Cytotoxic T Lymphocytes                      | 4.23          |
| PKCθ Signaling in T Lymphocytes                                 | 4.10          |
| Protein Kinase A Signaling                                      | 4.06          |
| FAK Signaling                                                   | 3.98          |
| fMLP Signaling in Neutrophils                                   | 3.95          |
| PRPP Biosynthesis I                                             | 3.88          |
| 5-aminoimidazole Ribonucleotide Biosynthesis I                  | 3.88          |
| G Beta Gamma Signaling                                          | 3.87          |
| Virus Entry via Endocytic Pathways                              | 3.81          |
| RhoGDI Signaling                                                | 3.74          |
| ERK/MAPK Signaling                                              | 3.69          |
| PI3K Signaling in B Lymphocytes                                 | 3.57          |
| Calcium Signaling                                               | 3.54          |
| Cell Cycle Control of Chromosomal Replication                   | 3.50          |
| Phospholipase C Signaling                                       | 3.50          |
| α-Adrenergic Signaling                                          | 3.41          |
| Antigen Presentation Pathway                                    | 3.34          |
| Telomerase Signaling                                            | 3.27          |
| Crosstalk between Dendritic Cells and Natural Killer Cells      | 3.26          |
| Telomere Extension by Telomerase                                | 3.18          |
| Sertoli Cell-Sertoli Cell Junction Signaling                    | 3.18          |
| Aldosterone Signaling in Epithelial Cells                       | 3.13          |
| Regulation of Actin-based Motility by Rho                       | 3.06          |
| Mismatch Repair in Eukaryotes                                   | 3.03          |
| FcyRIIB Signaling in B Lymphocytes                              | 3.03          |

**Supplemental Table S2. PU-H71 proteomics reveals teHsp90 chaperoned pathways.** (A) The union of the proteins identified in OCI-Ly1 and OCI-Ly7 PU-H71 proteomics assay were subjected to Ingenuity Pathway Analysis. Significantly represented pathways are listed here. BCR pathway is highlighted in orange.

# Supplementary Table S3

A

|                 | Toxicity<br>Day 13 |               |             |             | Washout<br>Day 27 |            |             |             |               |
|-----------------|--------------------|---------------|-------------|-------------|-------------------|------------|-------------|-------------|---------------|
| Test            | Control            | Ibrutinib     | PUH71       | Combination | Control           | Ibrutinib  | PUH71       | Combination | Reference     |
| WBC             | 6.87±2.09          | 7.78±3.36     | 4.67±1.82   | 5.17±0.87   | 8.17±3.36         | 6.77±0.76  | 6.64±3.01   | 7.12±0.37   | 6.4±2.5 K/uL  |
| RBC             | 11.00±0.54         | 10.49±0.64    | 10±0.62     | 9.47±0.42   | 11.32±0.14        | 11.46±0.45 | 9.57±0.48   | 9.60±0.11   | 8.53±0.5 M/uL |
| Hemoglobin      | 16.03±0.74         | 15.5±0.53     | 14.4±0.79   | 14.33±0.61  | 16.67±0.25        | 16.67±0.50 | 14.63±0.31  | 14.55±0.07  | 14.5±1.1 g/dL |
| Platelets       | 878±17.35          | 491.67±138.60 | 562±229.1   | 681±230.12  | 713.67±299.95     | 612±369.78 | 1156±692.60 | 1385±31.11  | 799-1300 K/uL |
| Hematocrit      | 57.8±3.75          | 54.17±4.40    | 48.6±3.72   | 44.83±3.18  | 56.83±1.98        | 57.60±2.17 | 48.83±2.80  | 48.80±0.42  | 32-54 %       |
| Neutrophils     | 1±0.89             | 0.98±0.97     | 0.77±0.23   | 1.54±0.92   | 1.51±1.81         | 1.64±1.05  | 1.04±0.22   | 1.31±0.28   | 0-1.8 K/uL    |
| Lymphocytes     | 5.28±2.04          | 6.33±2.65     | 3.71±1.87   | 3.32±157    | 6.29±4.47         | 4.51±1.08  | 5.08±2.40   | 5.33±0.64   | 2.5-10 K/uL   |
| Monocytes       | 0.35±0.19          | 0.34±0.15     | 0.11±0.04   | 0.22±0.13   | 0.28±0.33         | 0.44±0.35  | 0.31±0.31   | 0.25±0.00   | 0-0.2 K/uL    |
| Eosinophils     | 0.23±0.22          | 0.12±0.04     | 0.07±0.07   | 0.08±0.05   | 0.08±0.02         | 0.16±0.01  | 0.18±0.07   | 0.24±0.01   | 0-0.5 K/uL    |
| Basophils       | 0.01±0.00          | 0.007±0.006   | 0.01±0.00   | 0.02±0.01   | 0.01±0.00         | 0.01±0.01  | 0.02±0.02   | 0.01±0.01   | 0-0.4 K/uL    |
| Albumin         | 4.35±0.07          | 3.13±0.12     | 2.7±0.17    | 3.15±0.64   | 3.23±0.06         | 3.87±0.06  | 3.3±0.61    | 3.1±0.26    | 2.5-3.9 g/dL  |
| Total Protein   | 7.3±0.00           | 5.53±0.15     | 4.73±0.45   | 5.55±0.919  | 5.6±0.1           | 6.5±0.00   | 5.57±0.72   | 5.43±0.38   | 4.1-6.4 g/dL  |
| Globulin        | 3.0±0.07           | 2.4±0.1       | 2.03±0.47   | 2.4±0.28    | 2.37±0.06         | 2.63±0.06  | 2.27±0.12   | 2.33±0.12   | 1.3-2.8 g/dL  |
| Total Bilirubin | 0.9±0.14           | 0.27±0.12     | 0.23±0.06   | 0.7±0.28    | 0.27±0.12         | 0.83±0.05  | 0.63±0.15   | 0.43±0.15   | 0-0.3 mg/dL   |
| Creatinine      | 0.30±0.07          | 0.26±0.06     | 0.16±0.02   | 0.2±0.07    | 0.27±0.06         | 0.26±0.02  | 0.24±0.02   | 0.23±0.03   | 0.1-0.6 mg/dL |
| Cholesterol     | 246.5±3.54         | 111.33±16.01  | 155.5±23.33 | 159.5±58.69 | 95.67±8.74        | 154±13     | 117±27      | 97.67±15.63 | 70-100 mg/dL  |

**Supplemental Table S3. Ibrutinib and PU-H71 combination is non-toxic in mice. (A)** Blood from mice tested for ibrutinib-PU-H71 toxicity as in Supplementary

Figure 2 was collected after 12 days of treatment (Toxicity) and in a second cohort after a 2 week washout period (Washout). Blood was analyzed for differential blood cell count and chemistry panel.

# Supplemental Table S4

A

| Antigen                                            | Clone      | Catalog Number | Company                   |
|----------------------------------------------------|------------|----------------|---------------------------|
| CD79A                                              | HM47       |                | Santa Cruz Biotechnology  |
| CD79B                                              | SN8        |                | Santa Cruz Biotechnology  |
| CD79B                                              | FL-229     |                | Santa Cruz Biotechnology  |
| LYN                                                | 44         |                | Santa Cruz Biotechnology  |
| SYK                                                | 4D10       |                | Santa Cruz Biotechnology  |
| BTK                                                | D3H5       |                | Cell Signaling Technology |
| PLCy2                                              | Q-20       |                | Santa Cruz Biotechnology  |
| BLNK                                               | 2B11       |                | Santa Cruz Biotechnology  |
| HSP90                                              |            | ab13495        | Abcam                     |
| HSP90                                              | H9010      |                | StressMarq                |
| β-Actin                                            | AC-15      |                | Sigma Aldrich             |
| pSYK Y352                                          |            | 2701           | Cell Signaling Technology |
| pBTK Y223                                          |            | 5082           | Cell Signaling Technology |
| pPLCy2 Y759                                        |            | 3874           | Cell Signaling Technology |
| pLYN Y507                                          |            | 2731           | Cell Signaling Technology |
| pLYN Y396                                          |            | 1645-1         | Epitomics                 |
| AlexFluor 488 Mouse anti- SYK (pY348)              | I120-722   | 560081         | BD Biosciences            |
| AlexaFLuor 488 Mouse IgG1 K                        |            | 2317666        | BD Biosciences            |
| PE Mouse anti-BTK (pY223)                          | N35-86     | 562753         | BD Biosciences            |
| PE Mouse IgG1 K                                    |            | 551436         | BD Biosciences            |
| AlexaFluor 647 Mouse anti-PLCy2 Y759 AlexaFluor647 | K86-689.37 | 558498         | BD Biosciences            |
| AlexaFluor 647 MouselgG1 K                         |            | 557783         | BD Biosciences            |

Supplemental Figure 1

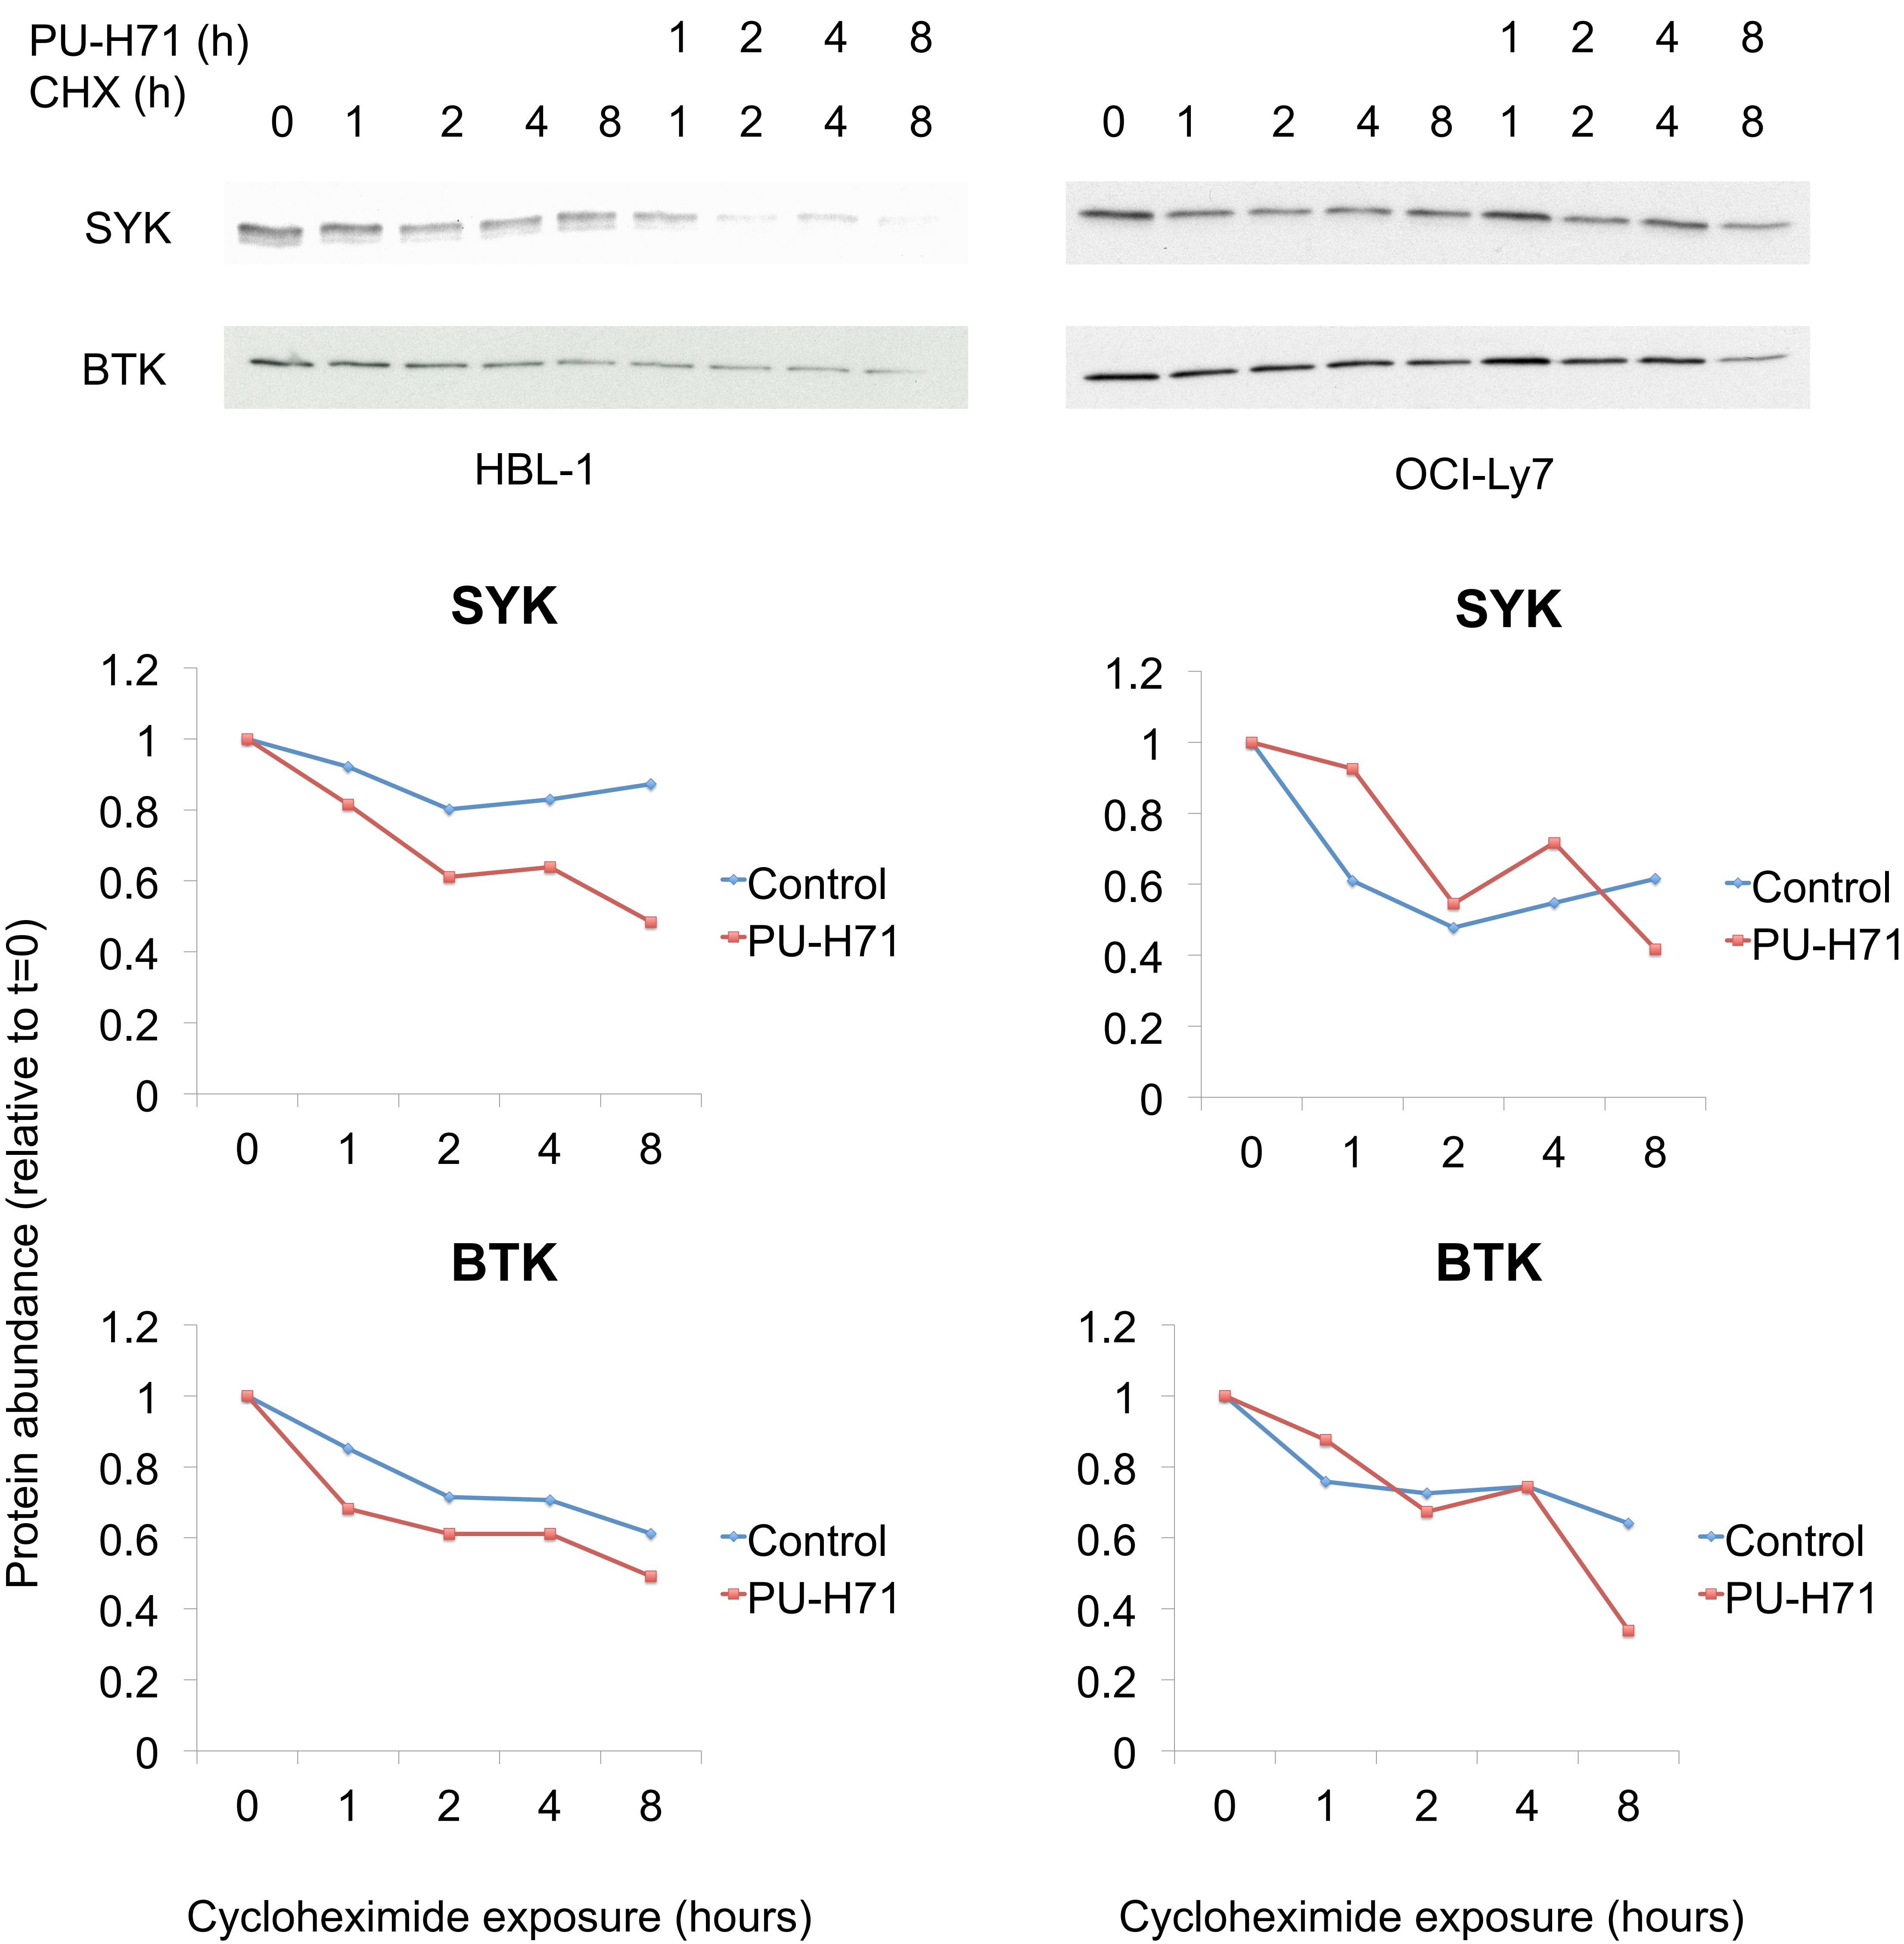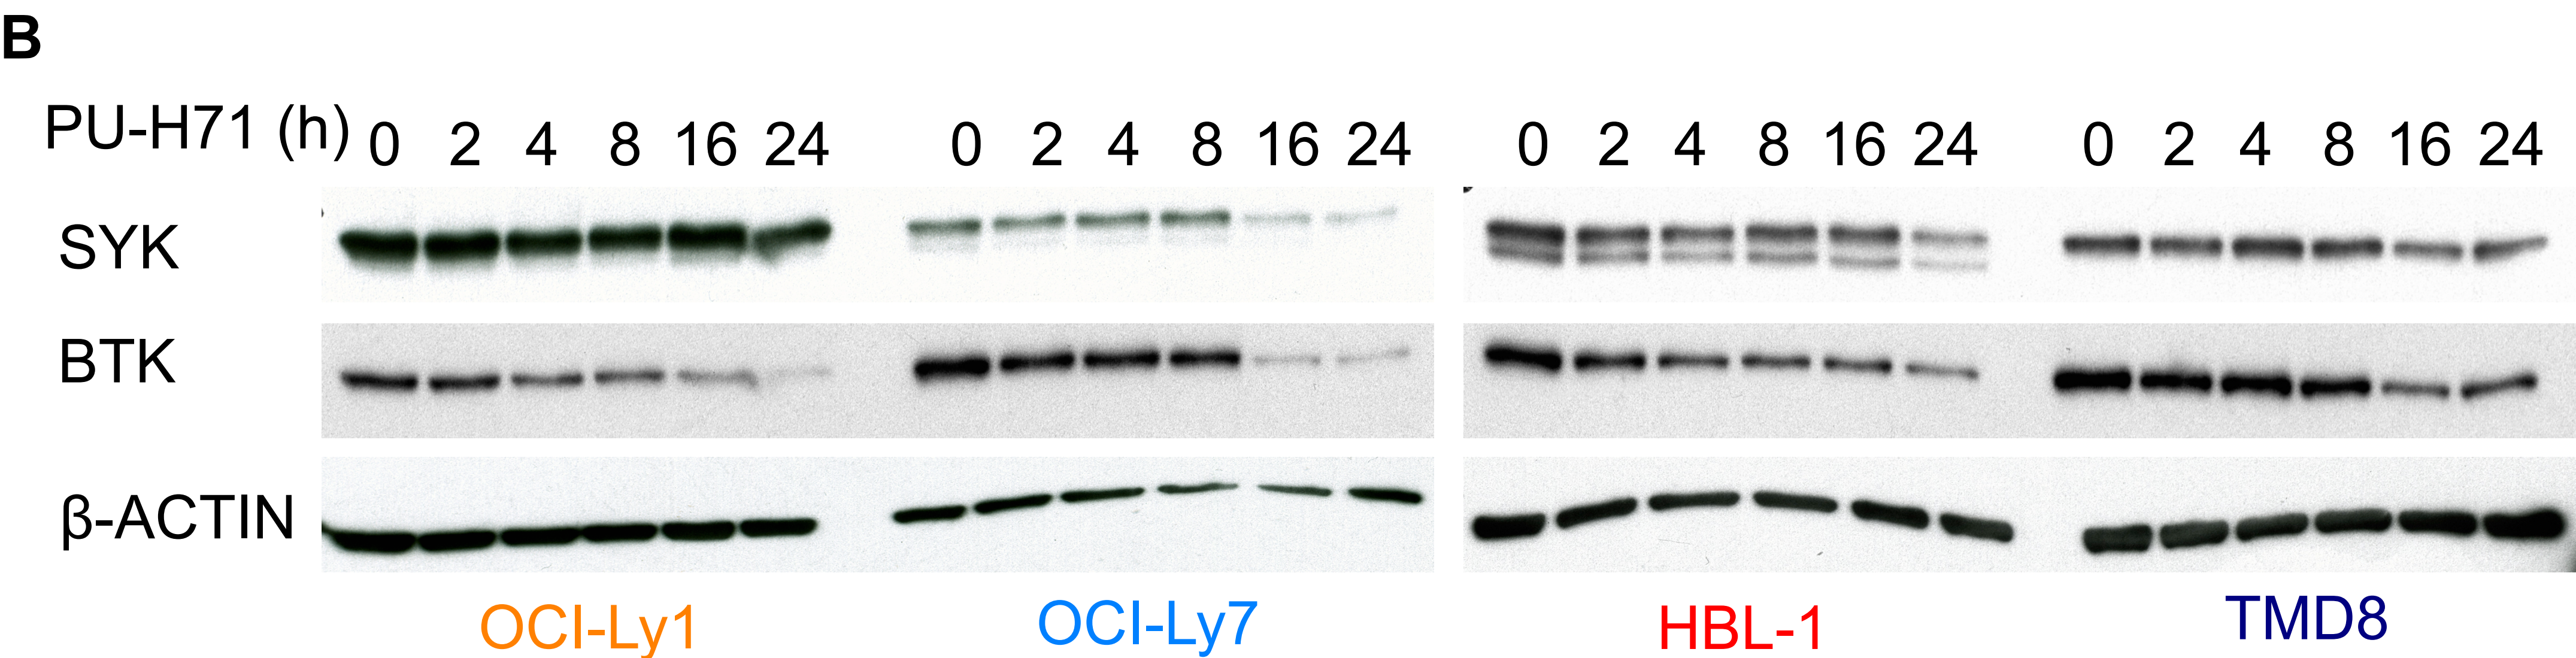

**Supplemental Figure 1. HSP90 inhibition induces degradation of SYK and BTK.** HBL-1 and OCI-Ly7 cells were exposed to cycloheximide (100  $\mu$ g/mL) and/or PU-H71 (1  $\mu$ M) for the times indicated. Lysates were subjected immunoblotting for the indicated proteins. The relative abundance of each protein relative to t = 0h was quantified by densitometry and is shown in the bar graph below. **(B)** Cells were exposed to PU-H71 (1  $\mu$ M) for the times indicated. Lysates were subjected to immunoblotting with the indicated antibodies

# Supplemental Figure 2

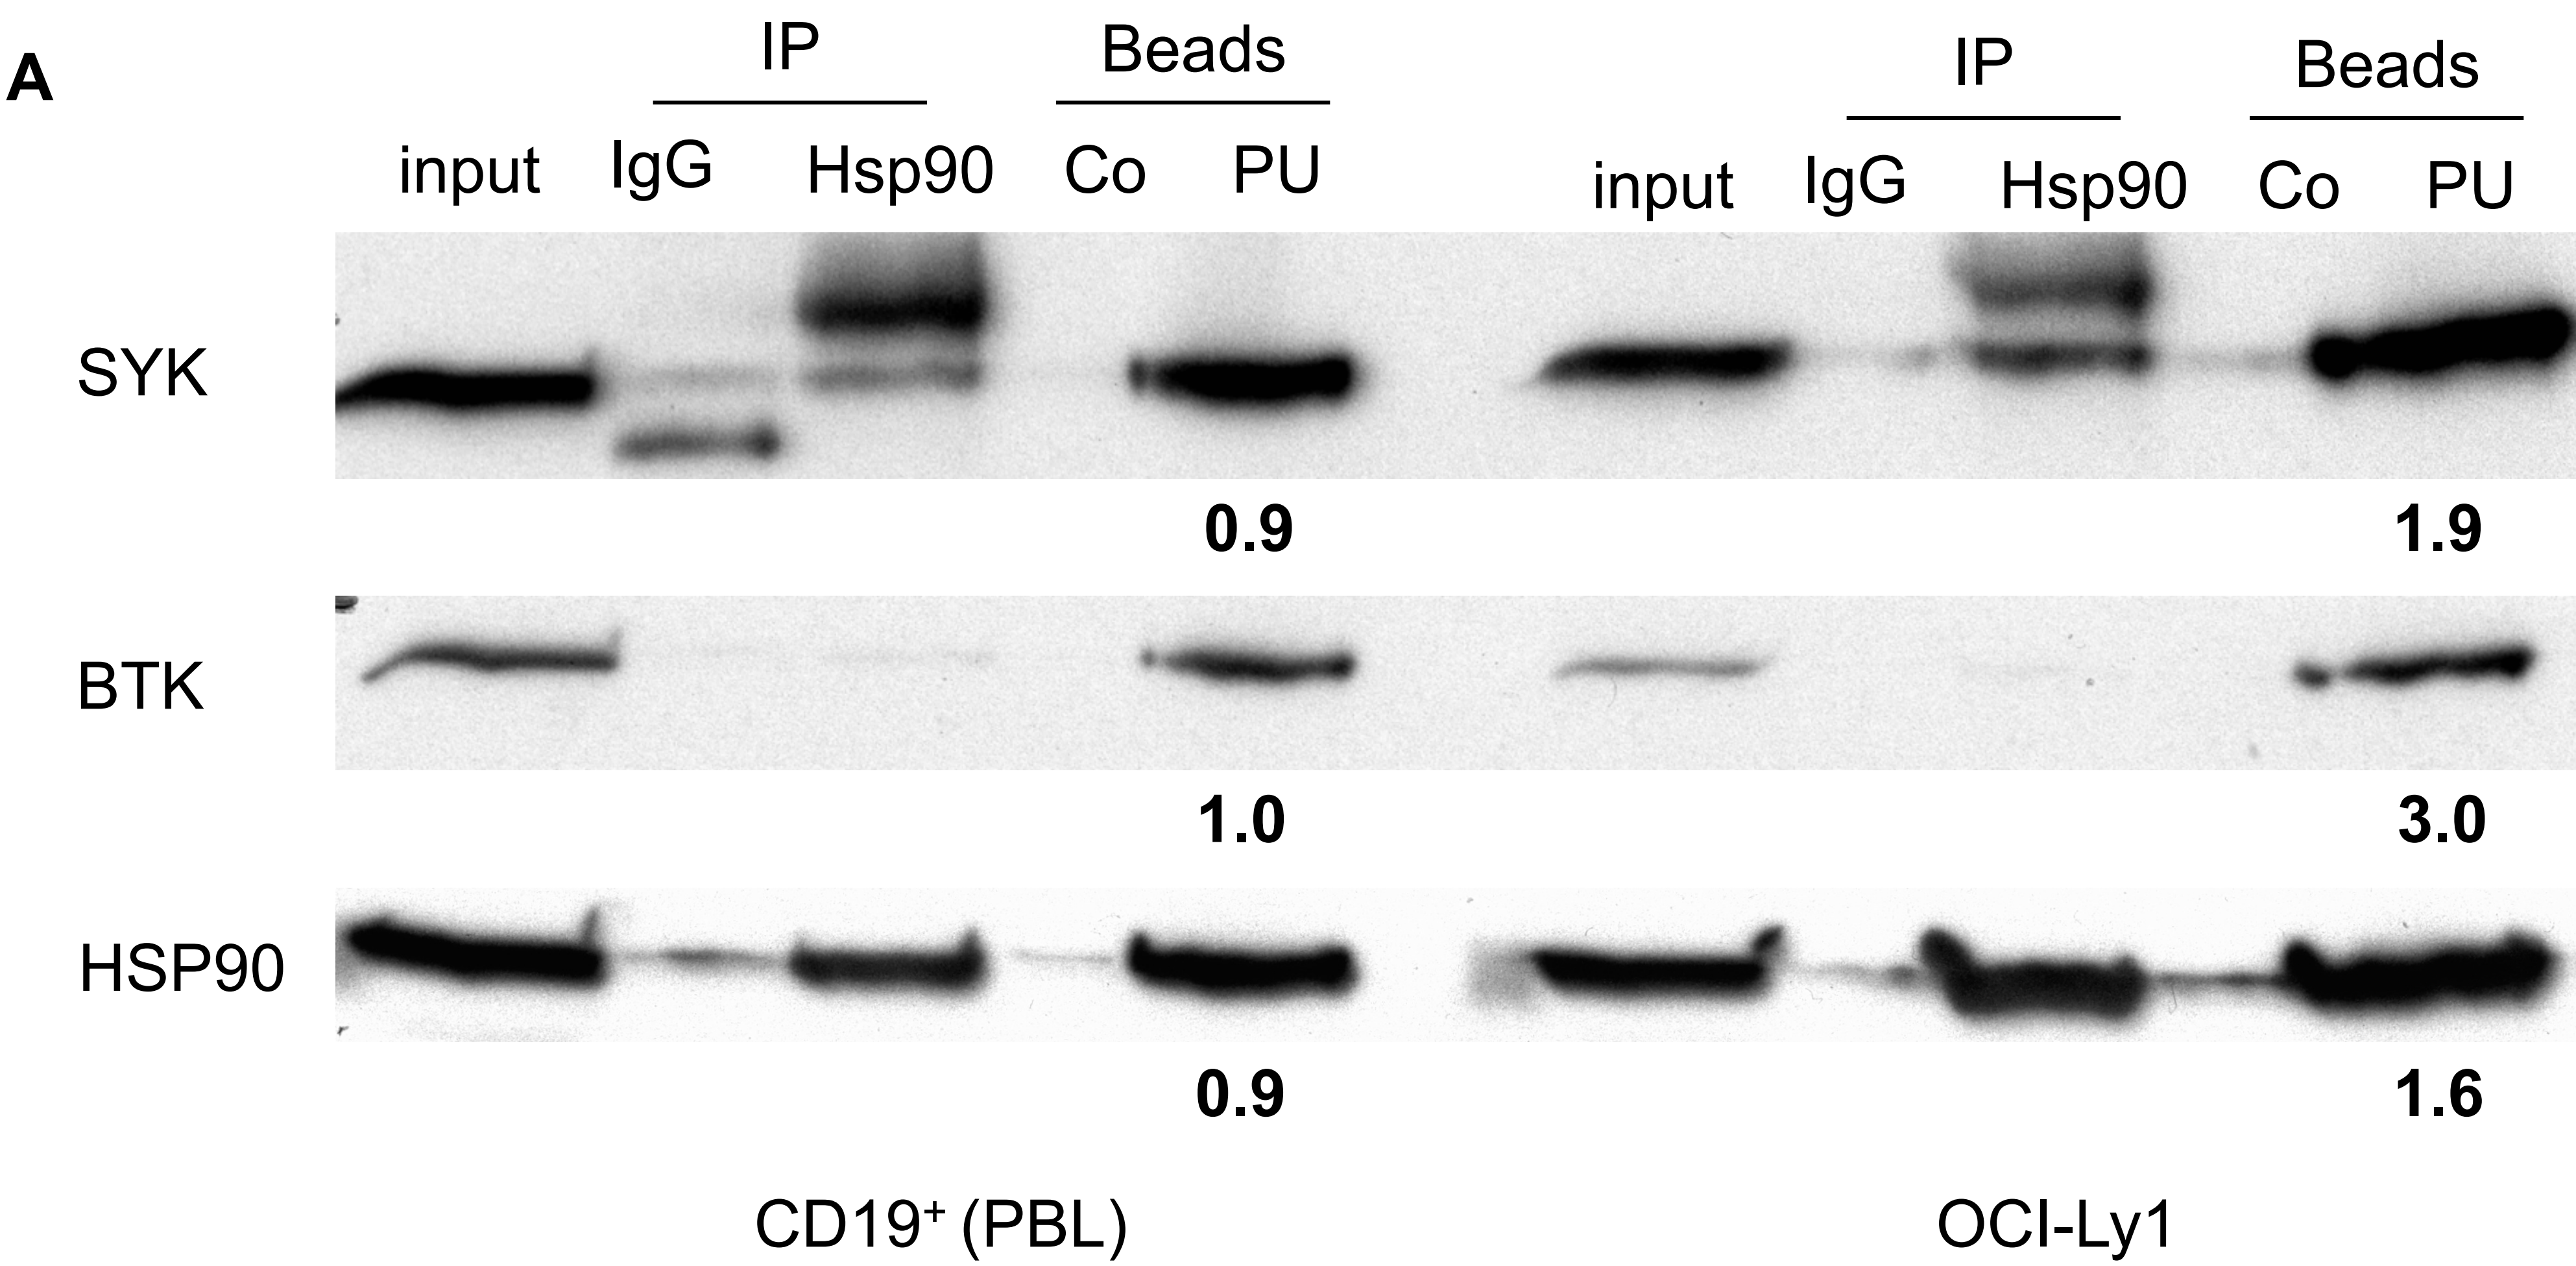

**Supplemental Figure 2. HSP90 complexes in DLBCL and normal cells.** (A) Lysates from CD19<sup>+</sup> cells from peripheral blood and OCI-Ly1 cells were subjected to immunoprecipitation with antibodies to IgG or HSP90 or chemical precipitation with PU-H71 (PU) or control chemical (CO) beads followed by immunoblotting for the indicated proteins. The relative abundance of protein precipitated by PU-H71 beads relative to input was quantified by densitometry and is shown numerically.

# Supplemental Figure 3

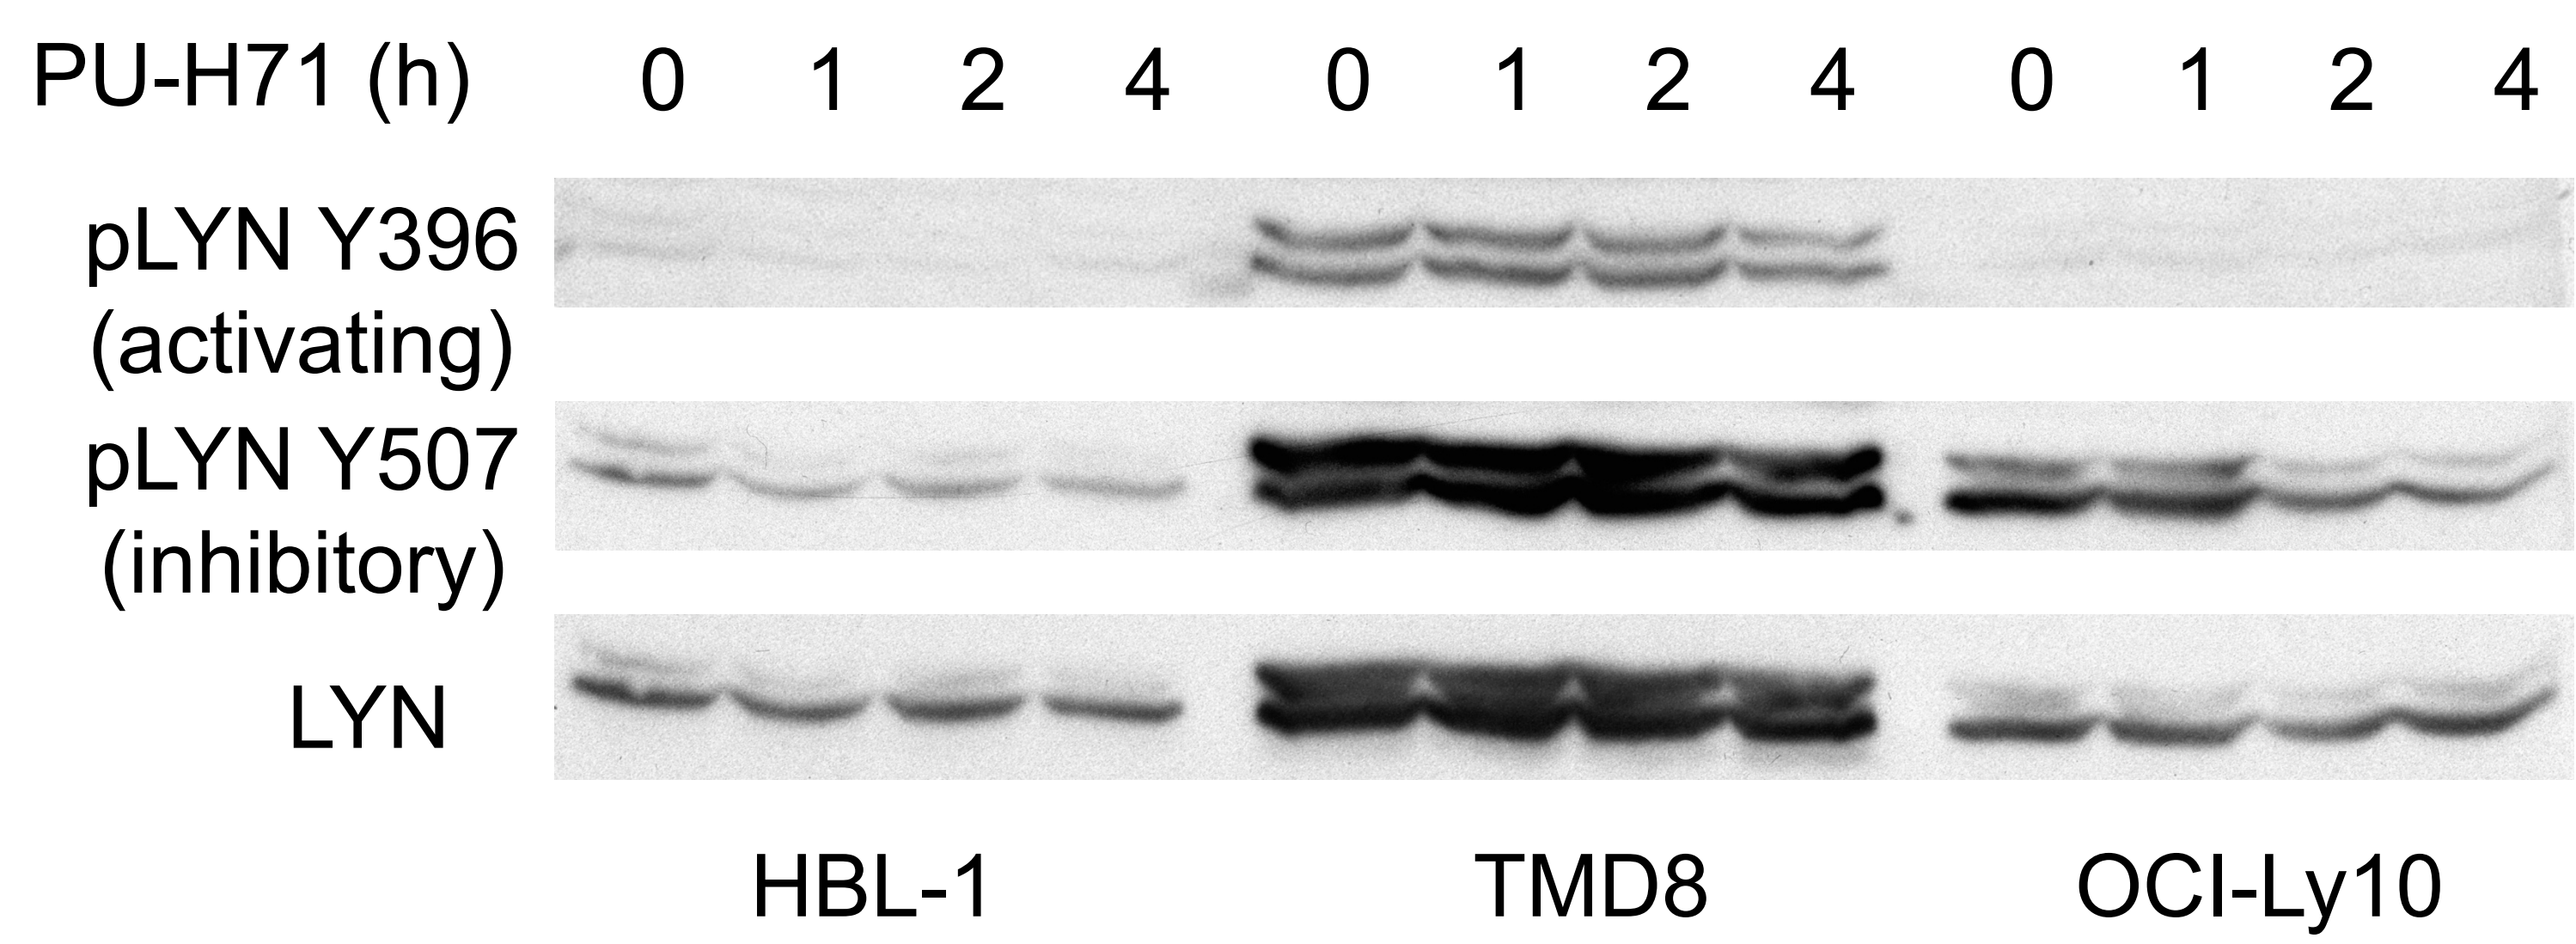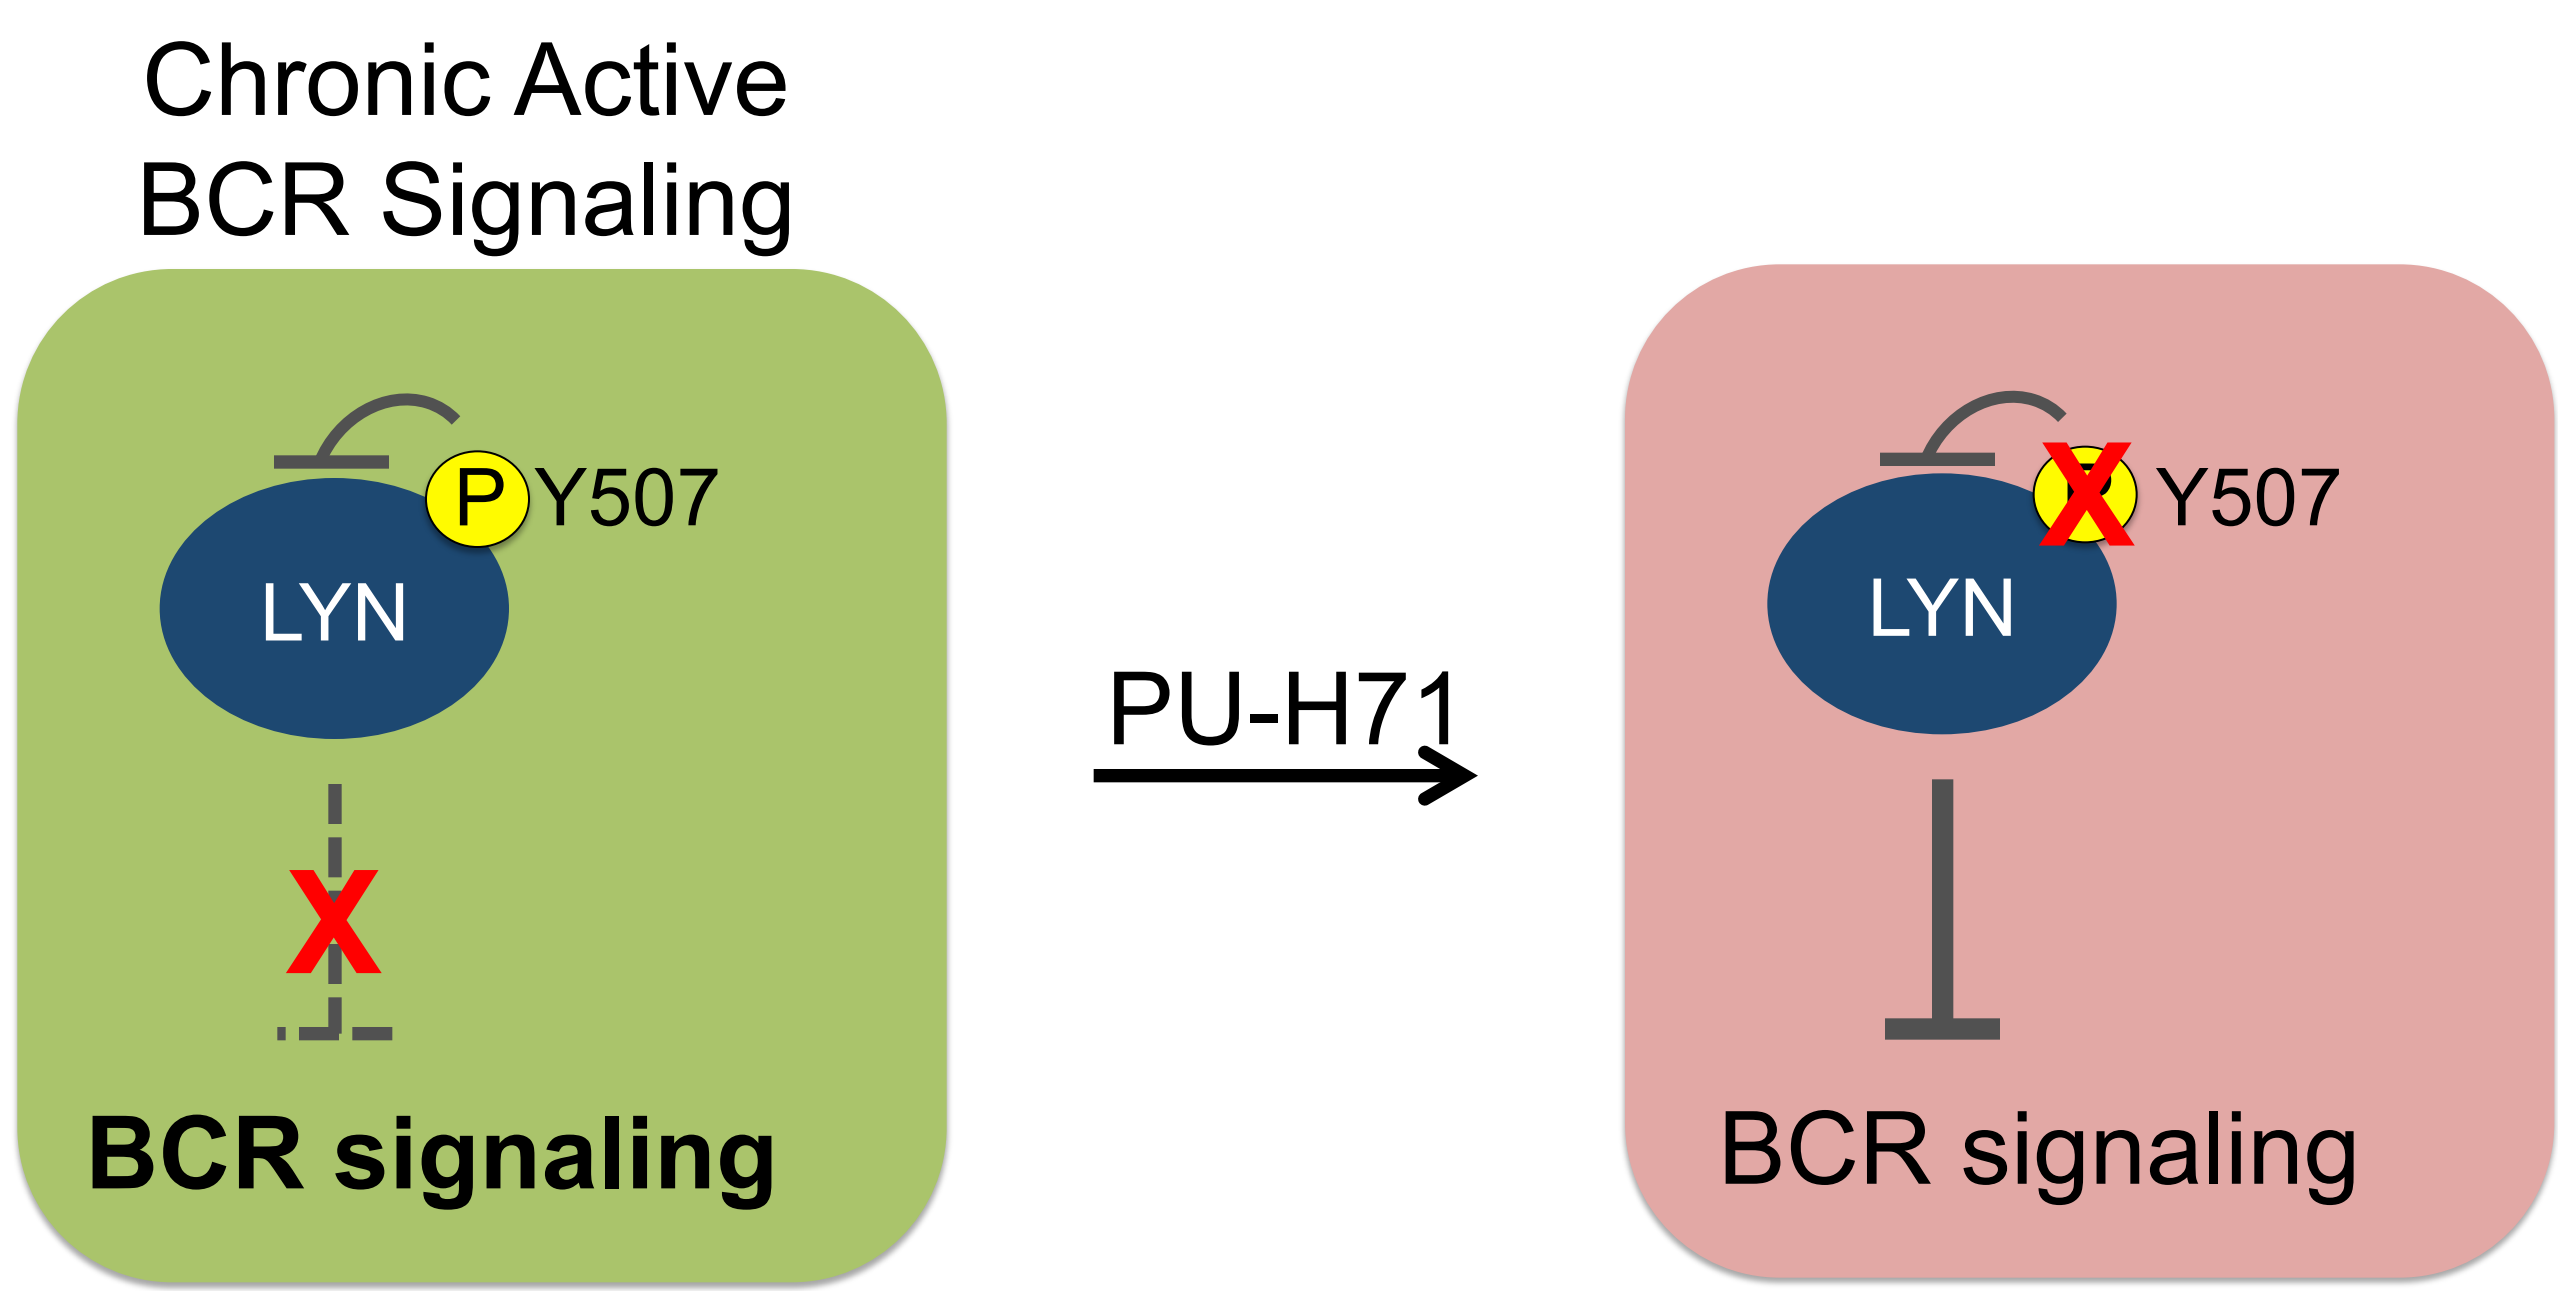

**Supplemental Figure 3. PU-H71 induces loss of LYN activity in DLBCL cells.** HBL-1, TMD8 and OCI-Ly10 cells were exposed PU-H71 (1  $\mu$ M) for increasing time as indicated. Lysates were subjected to immunoblotting with the indicated antibodies.

Supplemental Figure 4

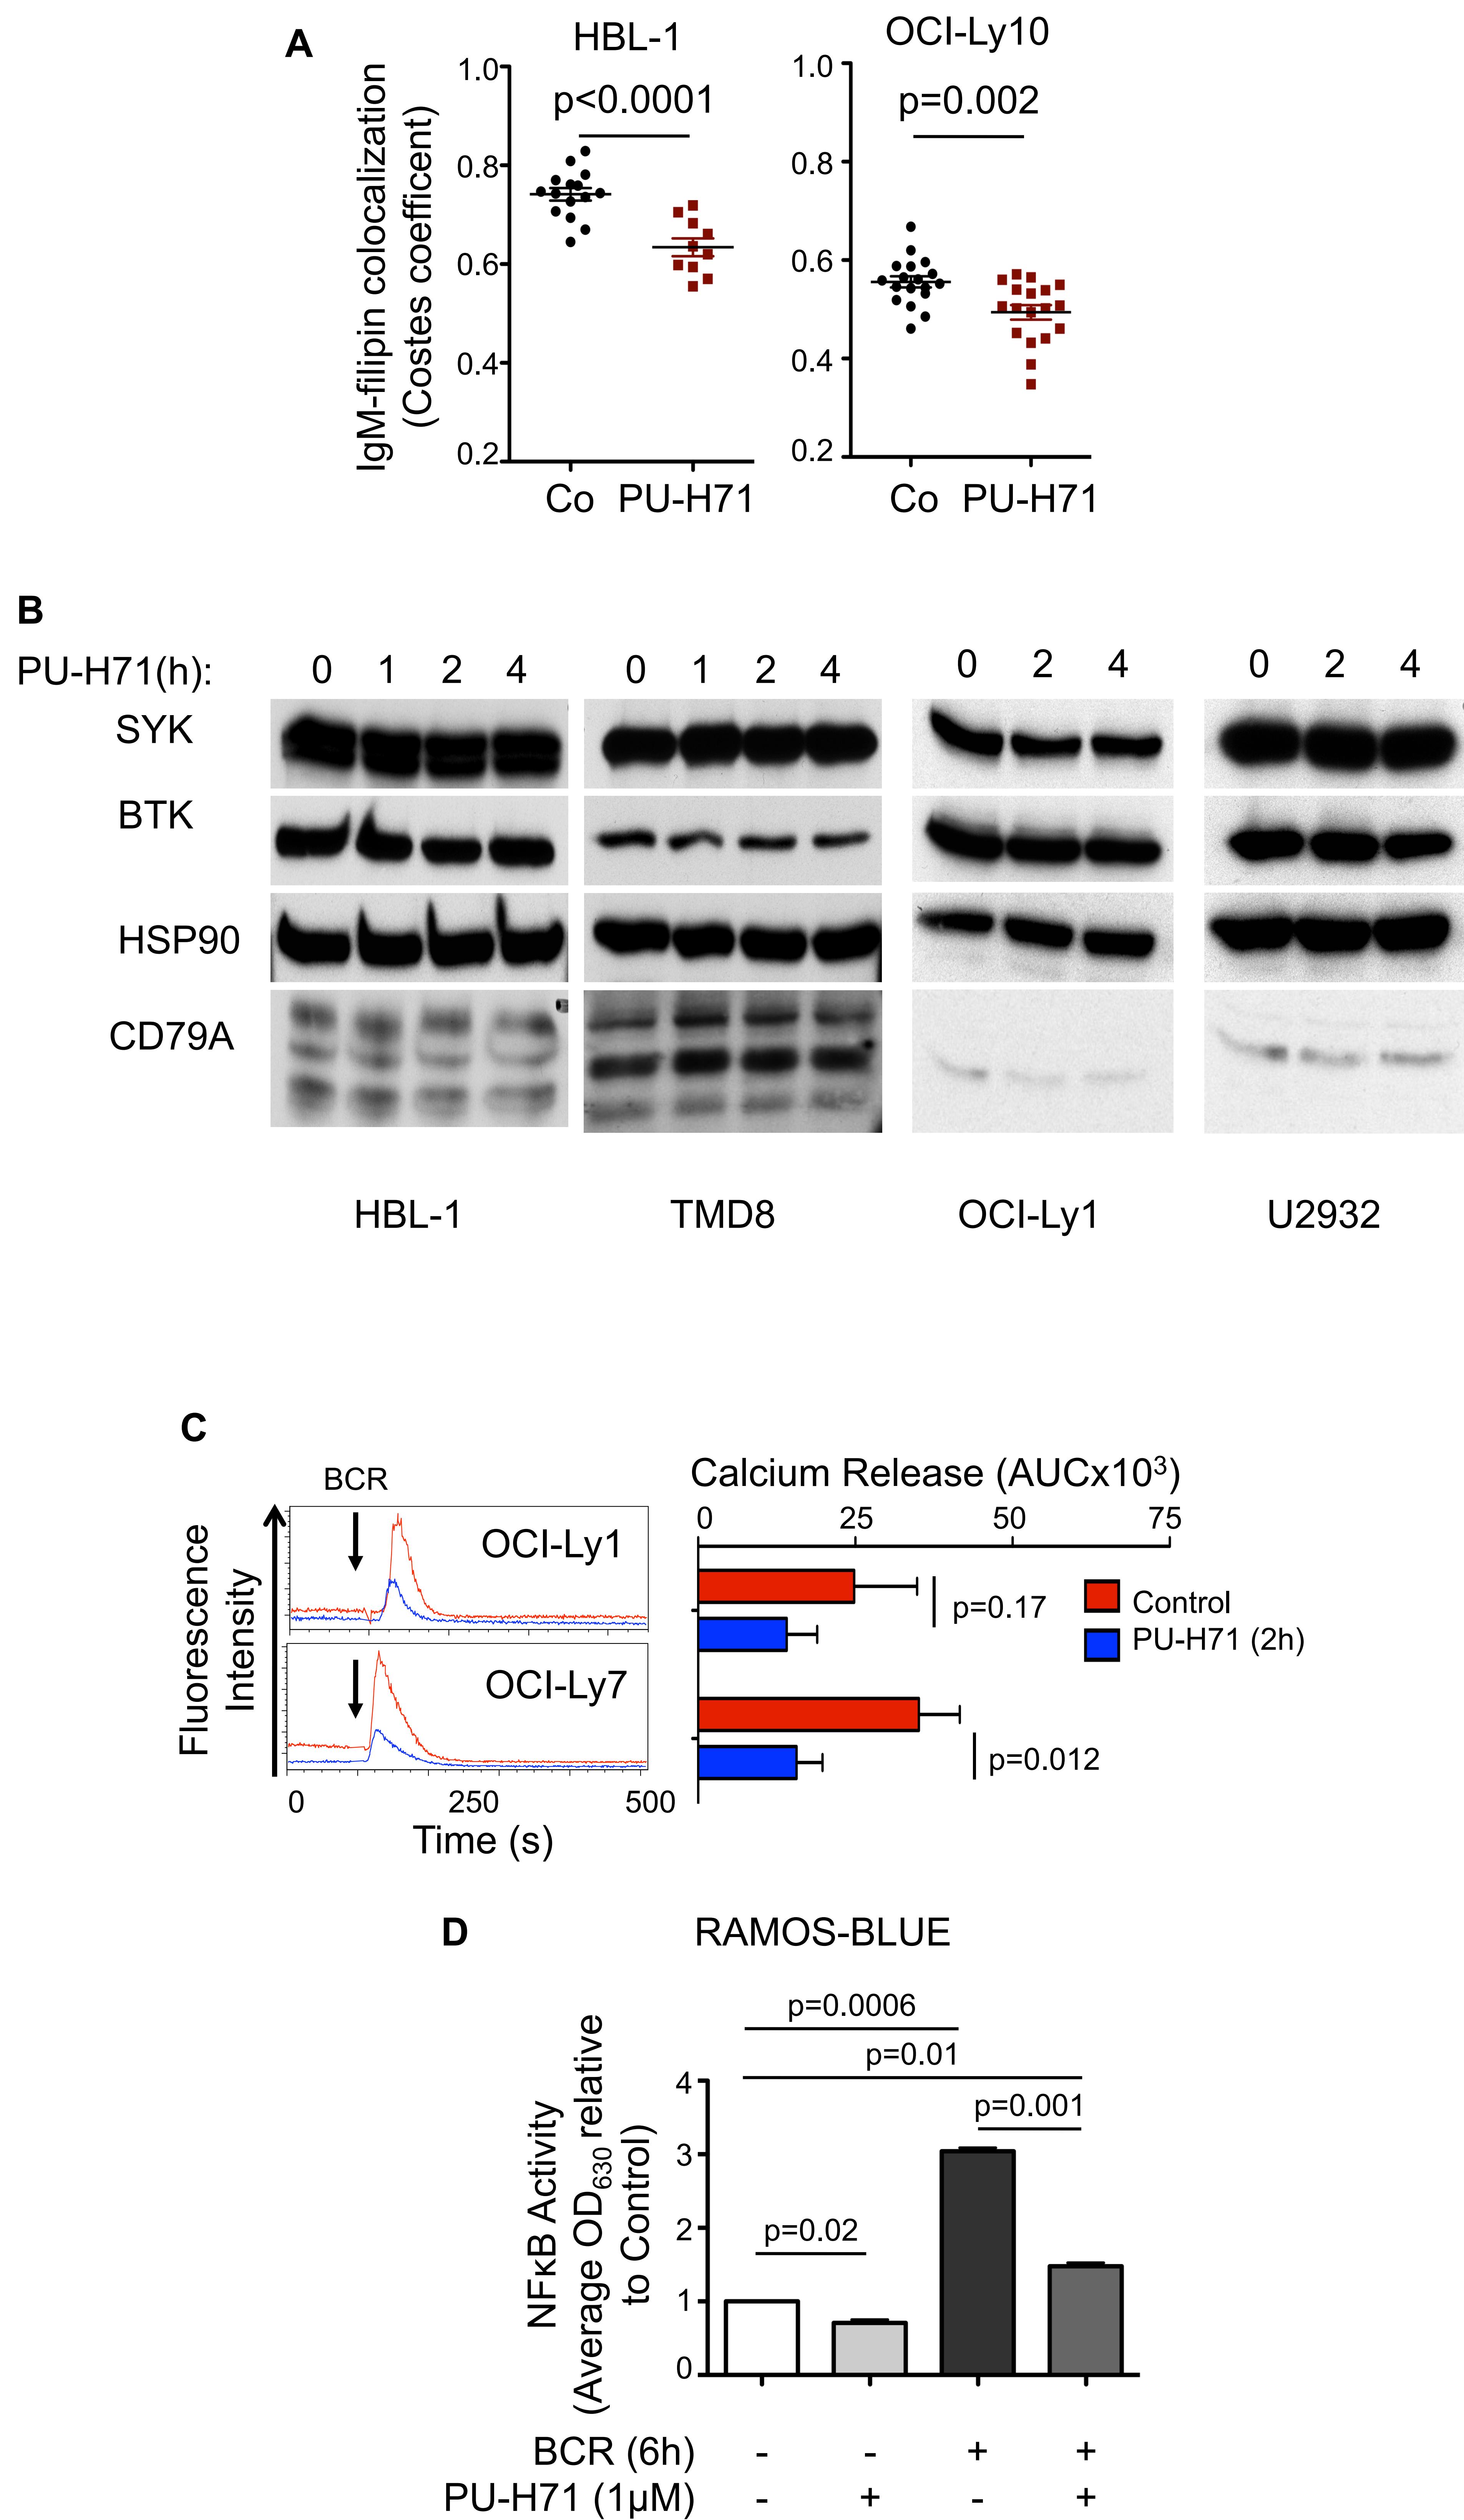

**Supplemental Figure 4. Inhibition of teHsp90 induces broad attenuation of BCR signaling at multiple nodes.** (A) IgM and filipin staining in HBL-1 and OCI-Ly10 cells exposed to vehicle or PU-H71 (1 μM, 4h) were visualized by confocal microscopy (60X). Colocalization was quantified (Costes method) for at least 10 high power fields. Two independent experiments. Unpaired t-test. (B) Lysates of DLBCL cell lines exposed to vehicle or PU-H71 (1 μM) were immunoblotted with the indicated antibodies. These immunoblots are the inputs for the immunoprecipitation experiments shown in Figure 4A. (C) OCI-Ly1 and OCI-Ly7 cells were treated with vehicle or PU-H71 (1 μM, 2h) then incubated with a fluorescent calcium indicator (Fluo 4AM, 2 μM, 30min). Calcium release was measured over time by flow cytometry before and after BCR stimulation (IgM+IgG 10 μg/mL at 120sec). Three biological replicates, unpaired t-test. (D) Ramos-Blue cells were treated with vehicle, PU-H71 (1 μM), IgM+IgG (10 μg/mL) or PU-H71 and IgM+IgG (6h). NFκB reporter activity was measured by colorimetric assay. Unpaired t-test.

Supplemental Figure 5

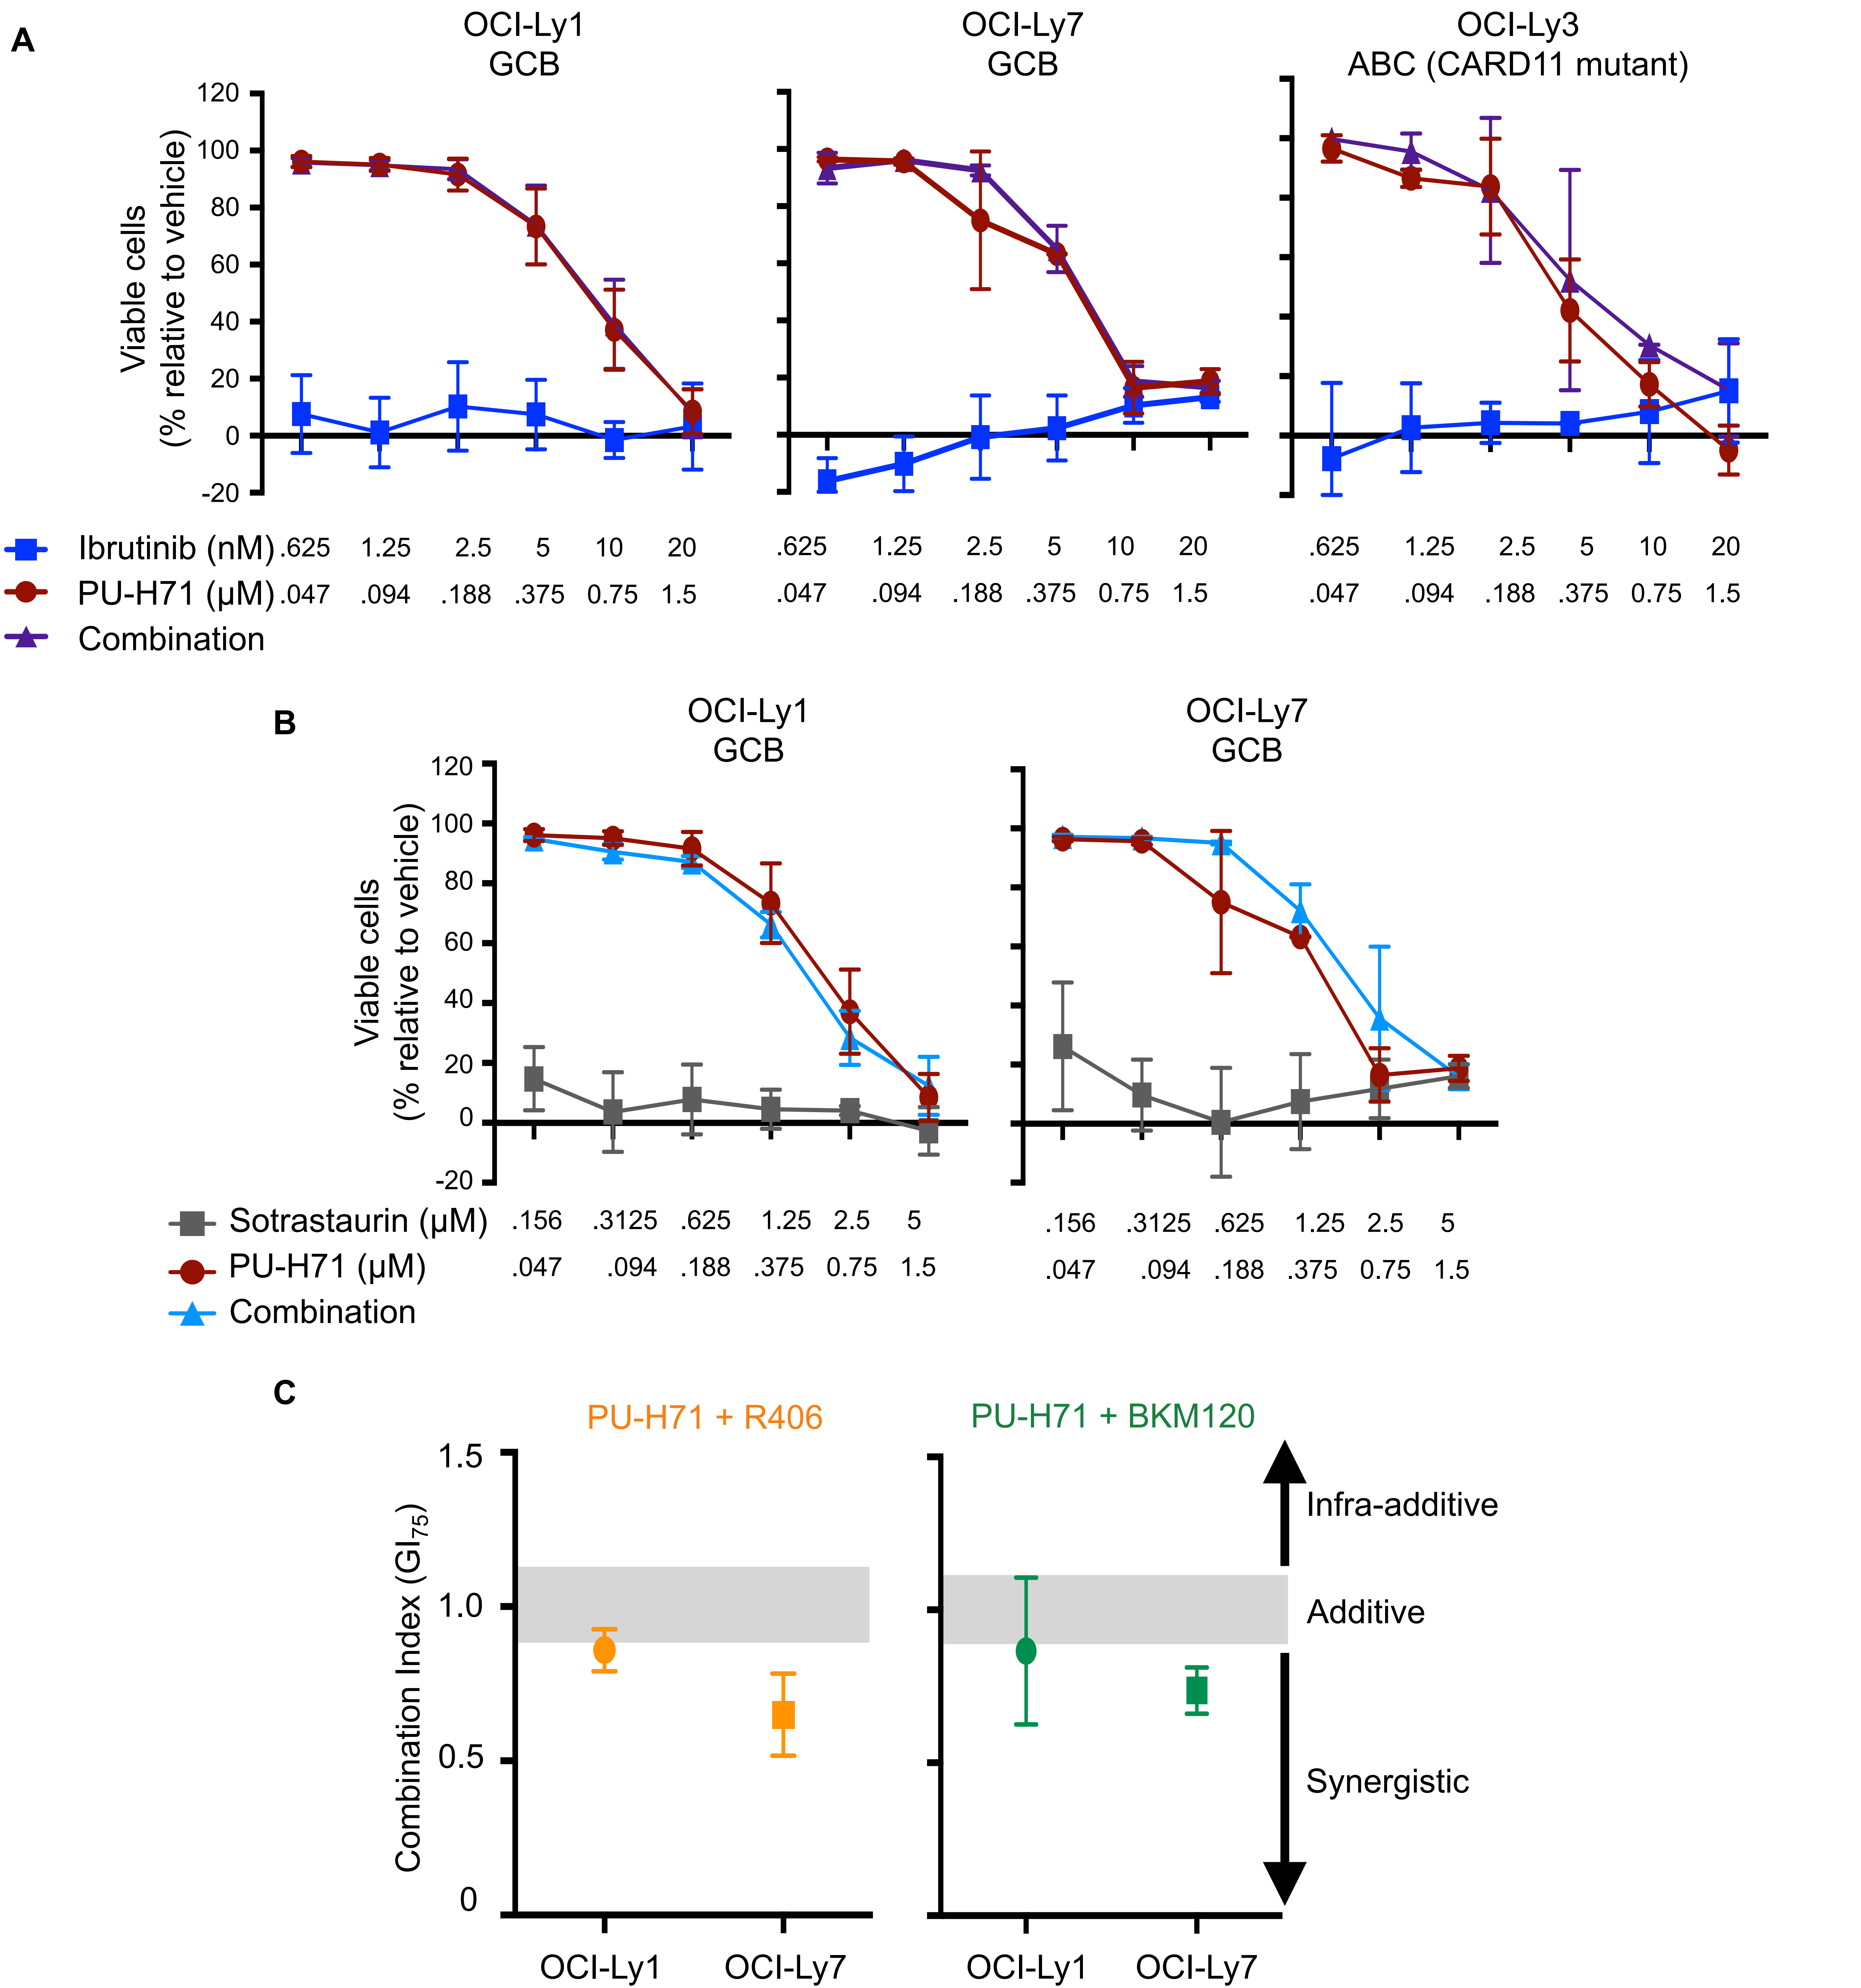

**Supplemental Figure 5. PU-H71 and BCR pathway inhibitors combine in GCB DLBCL cells.** (A) OCI-Ly1, OCI-Ly7 and OCI-Ly3 cells were treated with a dose curve of ibrutinib, PU-H71 or the combination. Cell viability was measured using a luminescent ATP method and normalized to vehicle-treated controls. Dose-effect curves show mean  $\pm$  SEM, 3 biological replicates. (B) OCI-Ly1 and OCI-Ly7 cells were treated with a dose curve of sotrastuarin, PU-H71 or the combination. Cell viability was measured using a luminescent ATP method and normalized to vehicle-treated controls. Dose-effect curves show mean  $\pm$  SEM, 3 biological replicates. (C) OCI-Ly1 and OCI-Ly7 cells were treated with a dose curve of R406 or BKM120, PU-H71 or the combination indicated. Cell viability was measured using a luminescent ATP method and normalized to vehicle-treated controls. Synergy was assessed using Compusyn. Combination Index values  $<0.9$  are synergistic. Mean  $\pm$  SEM, 3 biological replicates.

# Supplemental Figure 6

A

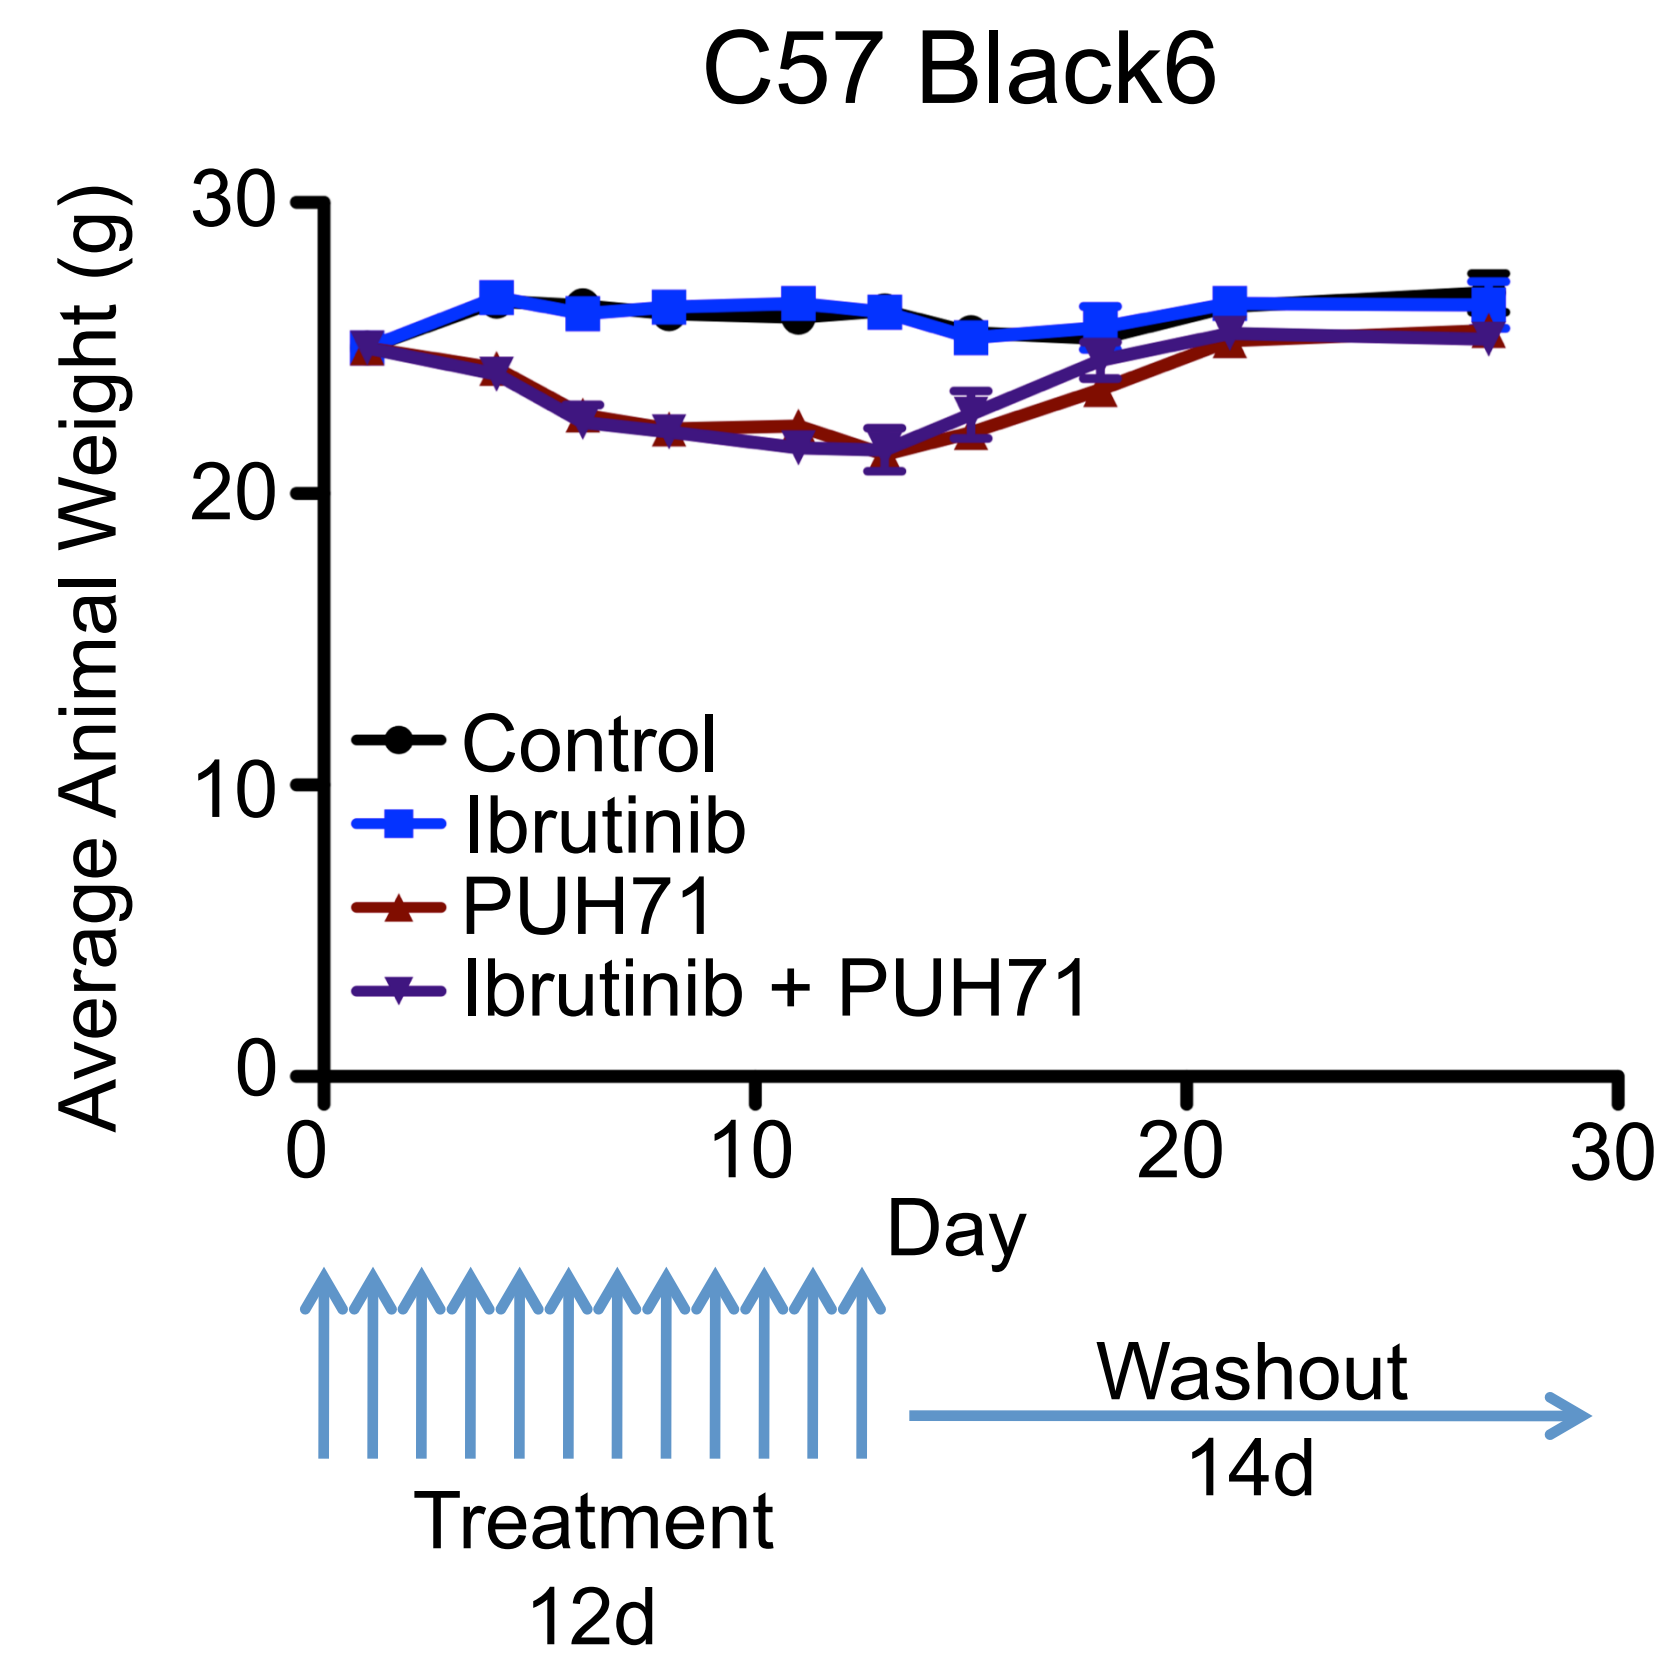

**Supplemental Figure 6. Ibrutinib and PU-H71 combination is non-toxic in mice.** (A) C57 Black mice (n=6/group until day 13) were treated with vehicle, ibrutinib (12.5 mg/kg/d ad libitum), PU-H71 (75 mg/kg/d i.p.) or the combination for 12 days. Animals were weighed every other day. Half of each group (n=3) was sacrificed after treatment for microscopic analysis of organs and blood. The other half (n=3) continued untreated for two weeks to serve as a “washout” group and were weighed every other day until sacrifice for organ and blood analysis.
